# Supplementary material for: Pb-Free Cs3Bi2I9 Perovskite as a Visible-Light-Active Photocatalyst for Organic Pollutant Degradation
Source: MDPI journal article supplement (doi:10.3390/nano10040763), 2020-04-16
Supplement: s1 [file s1]

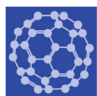

## SUPPORTING INFORMATIONS

# Pb-Free Cs<sub>3</sub>Bi<sub>2</sub>I<sub>9</sub> Perovskite as a Visible-Light-Active Photocatalyst for Organic Pollutant Degradation

Bianca-Maria Bresolin <sup>1,\*</sup>, Carsten Günnemann <sup>2</sup>, Detlef W. Bahnemann <sup>2,3,4</sup> and Mika Sillanpää <sup>5,6,7</sup>

- <sup>1</sup> Department of Separation Science, School of Engineering Science, Lappeenranta University of Technology, Sammonkatu 12, 50130 Mikkeli, Finland
  - <sup>2</sup> Institute of Technical Chemistry, Leibniz University Hannover, Callinstraße 3, D-30167 Hannover, Germany; guennemann@iftc.uni-hannover.de (C.G.); Bahnemann@iftc.uni-hannover.de (D.W.B.)
  - <sup>3</sup> Laboratory of Nano- and Quantum-Engineering (LNQE), Gottfried Wilhelm Leibniz University Hannover, Schneiderberg 39, D-30167 Hannover, Germany
  - <sup>4</sup> Laboratory “Photoactive Nanocomposite Materials”, Saint-Petersburg State University, Ulyanovskaya str. 1, Peterhof, 198504 Saint-Petersburg, Russia
  - <sup>5</sup> Institute of Research and Development, Duy Tan University, De Nang 550000, Vietnam; mikaesillanpaa@gmail.com
  - <sup>6</sup> Faculty of Environmental and Chemical Engineering, Duy Tan University, De Nang 550000, Vietnam
  - <sup>7</sup> School of Civil Engineering and Surveying, Faculty of Health, Engineering and Science, University of Southern Queensland, West Street, Toowoomba 4350, QLD, Australia
- \* Correspondence: biancabresolin@yahoo.it or Bianca.Maria.Bresolin@lut.fi

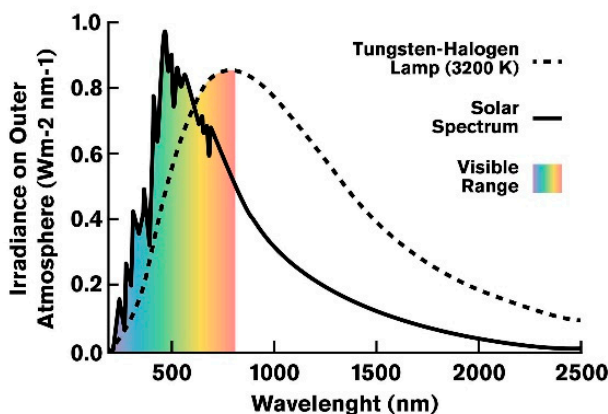

**Figure S1.** Irradiance spectrum of a Halogen lamp (3200K) compared to the solar irradiance on a surface per unit wavelength with emphasis on visible light range.

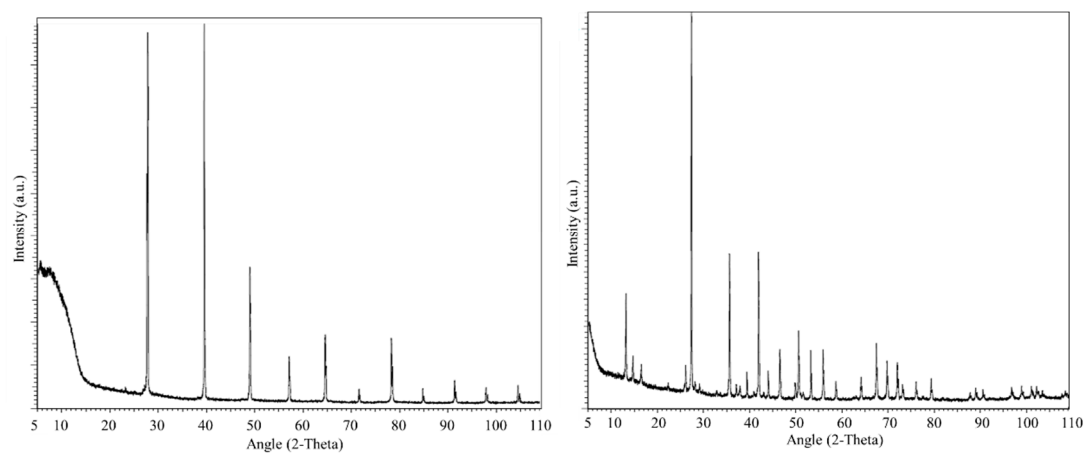

**Figure S2.** XRD patterns of CsI and BiI<sub>3</sub>.

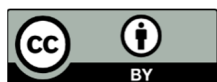

© 2020 by the authors. Submitted for possible open access publication under the terms and conditions of the Creative Commons Attribution (CC BY) license (<http://creativecommons.org/licenses/by/4.0/>).
